# Supplementary material for: Designing and Implementing a Virtual Anatomic Pathology Elective During the COVID-19 Pandemic
Source: PubMed Central journal article supplement — Acad Pathol. 2021 Apr 28;8:23742895211010265. doi: 10.1177/23742895211010265 (PMC8819740; doi:10.1177/23742895211010265), 2021-04-28
Supplement: sj-pdf-2-apc-10.1177_23742895211010265.pdf [file sj-pdf-2-apc-10.1177_23742895211010265.pdf]

## **Assignment List (& Description)**

1. Virtual sign out: *In weeks 2-4, the student will be expected to attend weekly sign-out in the sub-specialty of their choice, as discussed with the course director in the first week of the course. The course director will provide the student with each week's virtual sign out schedule on the Sunday or Monday of each respective week. The sign out will either be live with the pathology residents and attendings over Zoom or the student will review pre-selected sub-specialty cases from a virtual slide box with faculty.*
  - a. *For live virtual sign-out, the student will be available and near their email for sign-out between 2-4 PM.*
  - b. *For the virtual slide box, the student will be expected to review approximately 10-30 slides per week, providing a diagnosis and answering associated questions with an attending/resident over Zoom at predetermined times.*
  - c. *One excused absence is permissible. Please contact the course director in advance if possible.*
2. Pathology report: *The student writes their own pathology report after being provided with a gross and microscopic image of a specimen.*
3. Staging/grading tumors: *The student is assigned a tumor case based on their specialty interest and performs pathologic grading and staging of the tumor. There are cases in internal medicine, surgery, Ob/Gyn, and dermatology available.*
4. Unknown cases: *The students work together, acting as "detectives" to solve two "unknown" pathology cases. They will be encouraged to utilize the patient's clinical presentation, laboratory values, radiologic findings, and gross/histologic images to make a diagnosis. They will be expected to review the cases during the week and be prepared to discuss their answers with a resident over an approximately 1 hour Zoom meeting on the Friday of weeks 2 and 3.*
5. Final presentation: *The student performs literature review on a pathologic topic of their choice and presents a 10-15 minute presentation over Zoom. Expectations for the final presentation can be found in a separate linked document.*
6. Optional assignment: *The student is encouraged to pursue an optional scholarly project during this elective. If interested, the student will meet with the course director during the first week to discuss options for projects. Expectations of the project are in a separate linked document.*
  - a. *Write a case report/research paper with a pathologist*
  - b. *Create a pathology case for the 2nd year medical school pathology lab*
7. Final assessment: *Throughout the rotation, the student will be assessed by pathology attendings, fellows, and residents using a Global Rating Scale form. The feedback from these forms will be discussed with the student and will be used by the course director to complete a final assessment for the student.*

**Supplemental Material 2:** Description of assignments and expectations of students on the Virtual Anatomic Pathology Elective.
