# Supplementary material for: Designing and Implementing a Virtual Anatomic Pathology Elective During the COVID-19 Pandemic
Source: PubMed Central journal article supplement — Acad Pathol. 2021 Apr 28;8:23742895211010265. doi: 10.1177/23742895211010265 (PMC8819740; doi:10.1177/23742895211010265), 2021-04-28
Supplement: sj-pdf-3-apc-10.1177_23742895211010265.pdf [file sj-pdf-3-apc-10.1177_23742895211010265.pdf]

**Assessment Grid:**

| <b>Assessment</b>                      | <b>Contents</b>                                                                                                                                                                                                                                                                                 | <b>Grading Scale</b> | <b>Proportion of Grade</b> |
|----------------------------------------|-------------------------------------------------------------------------------------------------------------------------------------------------------------------------------------------------------------------------------------------------------------------------------------------------|----------------------|----------------------------|
| Pathology report                       |                                                                                                                                                                                                                                                                                                 | Pass/No Pass         | N/A                        |
| Staging/grading tumor                  |                                                                                                                                                                                                                                                                                                 | Pass/No Pass         | N/A                        |
| Unknown cases                          |                                                                                                                                                                                                                                                                                                 | Pass/No Pass         | N/A                        |
| Virtual sign out                       |                                                                                                                                                                                                                                                                                                 | Pass/No Pass         | N/A                        |
| Final Evaluation - Global Rating Scale | Based on attending, fellow, and resident feedback (encompassing student progression throughout the rotation, engagement during virtual sign outs and detective cases), as well as completion of formative assignments and attendance at conferences, grand rounds, and other required lectures. | H/E/S/N              | 60%                        |
| Final Presentation Assignment          | Slide presentation                                                                                                                                                                                                                                                                              | H/E/S/N              | 30%                        |
| Optional assessment for extra credit   | Research paper (case report, etc.), write case for 2nd medical student HHD                                                                                                                                                                                                                      | Pass/No Pass         | 10%                        |

**Supplemental Material 3:** An overview of the grading system for the Virtual Anatomic Pathology Elective.
